# Supplementary material
Source: PubMed Central journal article supplement (PMC4135852)
Supplement: AAC.02556-14_zac009143186so1.pdf [file AAC.02556-14_zac009143186so1.pdf]

TABLE S1. Primers used in this work.

| <b>Primer</b> | <b>Sequence (5'-3')</b> | <b>PCR product size (bp)</b> | <b>Use</b>                   | <b>Source</b>       |
|---------------|-------------------------|------------------------------|------------------------------|---------------------|
| RpsI-1        | GCTGCAAAACTGCCCCGCAACG  | 250                          | Quantification of RpsL mRNA  | Juan C et al., 2006 |
| RpsI-2        | ACCCGAGGTGTCCAGCGAACC   | 250                          | Quantification of RpsL mRNA  | Juan C et al., 2006 |
| ACrnaF        | GGGCTGGCCTCGAAAGAGGAC   | 246                          | Quantification of ampC mRNA  | Juan C et al., 2006 |
| ACrnaR        | GCACCGAGTCGGGGAAGTCA    | 246                          | Quantification of ampC mRNA  | Juan C et al., 2006 |
| creDrnaF      | CGGCGTGCTGCAGGATATCGC   | 251                          | Quantification of creD mRNA  | Moya B et al., 2009 |
| creDrnaR      | TGTCGACGTGGTACAGGCGCG   | 251                          | Quantification of creD mRNA  | Moya B et al., 2009 |
| NosRF         | GCCTGATCGAGGACCGCGGC    | 230                          | Quantification of NosZ mRNA  | This work           |
| NosRR         | GAGCAGGGCGCTGTAGAGATCG  | 230                          | Quantification of NosZ mRNA  | This work           |
| MoeA1F        | TCTACAACGCCAACCGTTACTGC | 214                          | Quantification of MoeA1 mRNA | This work           |
| MoeA1R        | TTGACCTCGCCAAGCTCGGCG   | 214                          | Quantification of MoeA1 mRNA | This work           |
| NirJF         | TCGCCGAGGCCCGCTTCGAC    | 215                          | Quantification of NirJ mRNA  | This work           |
| NirJR         | GTCGAGTTCGCGCATCAGGTCG  | 215                          | Quantification of NirJ mRNA  | This work           |

## REFERENCES

**Juan C, Moyá B, Pérez JL, Oliver A.** 2006 Stepwise upregulation of the *Pseudomonas aeruginosa* chromosomal cephalosporinase conferring high level beta-lactam resistance involves three AmpD homologues. *Antimicrob. Agents Chemother.* 50:1780–1787.

**Moya B., A. Dötsch, C. Juan, J. Blázquez, L. Zamorano, S. Haussler, A. Oliver.** 2009.  $\beta$ -Lactam resistance response triggered by inactivation of a nonessential penicillin-binding protein. *PloS Pathog.* 5:e1000353.
